# Supplementary material for: Substituent directed selectivity in anion recognition by a new class of simple osmium-pyrazole derived receptors
Source: Royal Society of Chemistry journal article supplement (doi:10.1039/c5dt04538j), 2015-12-18
Supplement: c5dt04538j1.pdf [file c5dt04538j1.pdf]

## Supplementary Information

### **Substituent directed selectivity in anion recognition by a new class of simple osmium-pyrazole derived receptor**

Ankita Das, Prasenjit Mondal, Moumita Dasgupta, Nand Kishore\* and Goutam Kumar Lahiri\*

*Department of Chemistry, Indian Institute of Technology Bombay, Powai, Mumbai-400076, India. E-mail: [lahiri@chem.iitb.ac.in](mailto:lahiri@chem.iitb.ac.in)*

**Table S1** Experimental and DFT calculated selected bond angles ( $^{\circ}$ ) for [1]ClO<sub>4</sub>

| Bond angles ( $^{\circ}$ ) | [1]ClO <sub>4</sub> |        |
|----------------------------|---------------------|--------|
|                            | X-ray               | DFT    |
| N1-Os1-N3                  | 86.9(3)             | 87.14  |
| N1-Os1-N4                  | 90.5(3)             | 90.90  |
| N1-Os1-N5                  | 174.2(3)            | 172.96 |
| N1-Os1-N6                  | 95.9(3)             | 95.94  |
| N3-Os1-N4                  | 78.7(3)             | 77.99  |
| N3-Os1-N5                  | 98.2(3)             | 98.97  |
| N3-Os1-N6                  | 176.0(3)            | 176.37 |
| N4-Os1-N5                  | 93.2(3)             | 93.76  |
| N4-Os1-N6                  | 98.4(3)             | 100.00 |
| N5-Os1-N6                  | 79.2(3)             | 78.07  |
| N1-Os1-C11                 | 90.0(2)             | 87.92  |
| N3-Os1-C11                 | 95.7(2)             | 95.47  |
| N4-Os1-C11                 | 174.4(2)            | 173.41 |
| N5-Os1-C11                 | 86.7(2)             | 88.02  |
| N6-Os1-C11                 | 87.1(2)             | 86.55  |
| N2-H2-C11                  | 123.8               | 134.22 |
| N2-H2-O1                   | 136.5               | -      |

**Table S2** Experimental and DFT calculated selected bond angles (°) for [2]ClO<sub>4</sub>

| Bond angles (°) | [2]ClO <sub>4</sub> |        |
|-----------------|---------------------|--------|
|                 | X-ray               | DFT    |
| N1-Os1-N3       | 83.1(2)             | 86.52  |
| N1-Os1-N4       | 93.5(2)             | 94.75  |
| N1-Os1-N5       | 177.3(3)            | 172.51 |
| N1-Os1-N6       | 99.0(2)             | 96.05  |
| N3-Os1-N4       | 78.0(2)             | 77.88  |
| N3-Os1-N5       | 99.6(2)             | 99.52  |
| N3-Os1-N6       | 177.7(2)            | 176.99 |
| N4-Os1-N5       | 86.5(2)             | 90.85  |
| N4-Os1-N6       | 101.0(3)            | 100.31 |
| N5-Os1-N6       | 78.3(2)             | 78.03  |
| N1-Os1-Cl1      | 87.66(17)           | 87.91  |
| N3-Os1-Cl1      | 96.00(17)           | 95.16  |
| N4-Os1-Cl1      | 173.70(19)          | 172.36 |
| N5-Os1-Cl1      | 92.59(18)           | 87.15  |
| N6-Os1-Cl1      | 84.92(18)           | 86.49  |
| N2-H2-Cl1       | 114.9               | 136.27 |
| N2-H2-O1        | 155.9               | -      |

**Table S3** DFT calculated selected MO compositions for **1<sup>n</sup>** and **2<sup>n</sup>**

| Complex                                 | MO      | Fragments              | % Contribution |
|-----------------------------------------|---------|------------------------|----------------|
| <b>1<sup>3+</sup></b> ( <i>S</i> = 1)   | β -LUMO | Os/bpy/Cl              | 67/14/12       |
| <b>1<sup>2+</sup></b> ( <i>S</i> = 1/2) | β -HOMO | Os/bpy/HL <sub>1</sub> | 63/15/11       |
|                                         | β -LUMO | Os/bpy/Cl              | 71/17/09       |
| <b>1<sup>+</sup></b> ( <i>S</i> = 0)    | HOMO    | Os/Cl/bpy              | 64/17/16       |
|                                         | LUMO    | bpy                    | 89             |
| <b>1</b> ( <i>S</i> = 1/2)              | SOMO    | bpy                    | 91             |
| <b>2<sup>3+</sup></b> ( <i>S</i> = 1)   | β -LUMO | Os/HL <sub>2</sub>     | 59/24          |
| <b>2<sup>2+</sup></b> ( <i>S</i> = 1/2) | β -HOMO | Os/HL <sub>2</sub>     | 50/38          |
|                                         | β -LUMO | Os/bpy                 | 70/19          |
| <b>2<sup>+</sup></b> ( <i>S</i> = 0)    | HOMO    | Os/bpy/Cl              | 69/15/11       |
|                                         | LUMO    | bpy                    | 88             |
| <b>2</b> ( <i>S</i> = 1/2)              | SOMO    | bpy                    | 91             |

**Table S4** Composition and energies of selected molecular orbitals of  $\mathbf{1}^+$  ( $S=0$ )

| MO     | Energy(eV) | Composition |                 |      |      |
|--------|------------|-------------|-----------------|------|------|
|        |            | Os          | HL <sub>1</sub> | bpy  | Cl   |
| HOMO-5 | -9.696     | 0.06        | 0.04            | 0.37 | 0.53 |
| HOMO-4 | -9.654     | 0.10        | 0.03            | 0.32 | 0.56 |
| HOMO-3 | -9.483     | 0.03        | 0.02            | 0.65 | 0.30 |
| HOMO-2 | -7.919     | 0.66        | 0.10            | 0.20 | 0.03 |
| HOMO-1 | -7.749     | 0.61        | 0.02            | 0.20 | 0.16 |
| HOMO   | -7.547     | 0.64        | 0.02            | 0.16 | 0.17 |
| LUMO   | -4.818     | 0.09        | 0.01            | 0.89 | 0.01 |
| LUMO+1 | -4.660     | 0.10        | 0.01            | 0.88 | 0.01 |
| LUMO+2 | -4.032     | 0.03        | 0.01            | 0.96 | 0.00 |
| LUMO+3 | -3.766     | 0.05        | 0.00            | 0.94 | 0.00 |
| LUMO+4 | -3.742     | 0.04        | 0.01            | 0.95 | 0.00 |
| LUMO+5 | -3.591     | 0.06        | 0.02            | 0.92 | 0.00 |

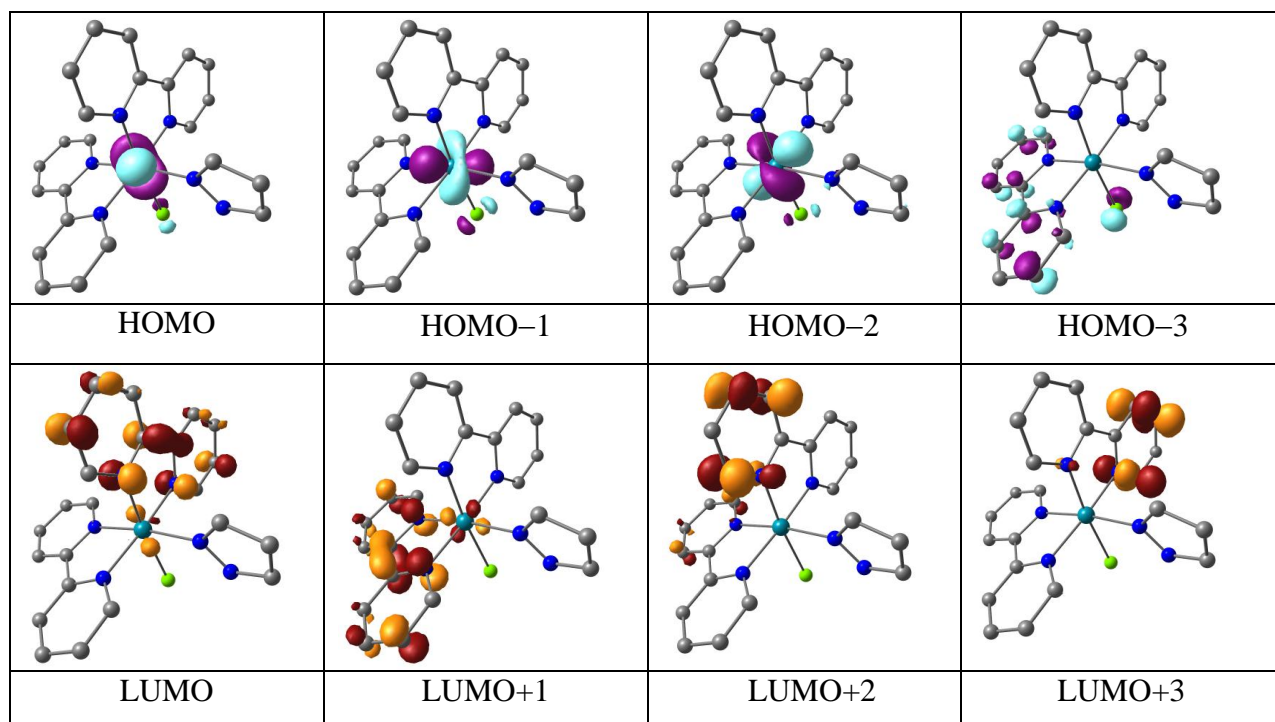

**Table S5** Composition and energies of selected molecular orbitals of  $\mathbf{1}^{2+}$  ( $S=1/2$ )

| MO             | Energy(eV) | Composition |                 |      |      |
|----------------|------------|-------------|-----------------|------|------|
|                |            | Os          | HL <sub>1</sub> | bpy  | Cl   |
| $\alpha$ -spin |            |             |                 |      |      |
| HOMO-5         | -13.136    | 0.15        | 0.66            | 0.15 | 0.03 |
| HOMO-4         | -13.023    | 0.03        | 0.12            | 0.84 | 0.02 |
| HOMO-3         | -12.846    | 0.03        | 0.03            | 0.87 | 0.07 |
| HOMO-2         | -12.621    | 0.42        | 0.11            | 0.20 | 0.27 |
| HOMO-1         | -12.279    | 0.56        | 0.09            | 0.16 | 0.19 |
| SOMO           | -12.193    | 0.59        | 0.15            | 0.15 | 0.11 |
| LUMO           | -8.327     | 0.06        | 0.01            | 0.92 | 0.00 |
| LUMO+1         | -8.108     | 0.06        | 0.00            | 0.92 | 0.01 |
| LUMO+2         | -7.375     | 0.02        | 0.01            | 0.97 | 0.00 |
| LUMO+3         | -7.056     | 0.03        | 0.00            | 0.97 | 0.00 |
| LUMO+4         | -6.985     | 0.04        | 0.00            | 0.96 | 0.00 |
| LUMO+5         | -6.944     | 0.02        | 0.01            | 0.97 | 0.00 |
| $\beta$ -spin  |            |             |                 |      |      |
| HOMO-5         | -13.422    | 0.08        | 0.06            | 0.20 | 0.66 |
| HOMO-4         | -13.034    | 0.04        | 0.53            | 0.38 | 0.05 |
| HOMO-3         | -13.005    | 0.03        | 0.28            | 0.65 | 0.04 |
| HOMO-2         | -12.825    | 0.00        | 0.01            | 0.97 | 0.02 |
| HOMO-1         | -12.020    | 0.61        | 0.08            | 0.16 | 0.15 |
| HOMO           | -11.938    | 0.63        | 0.11            | 0.15 | 0.11 |
| LUMO           | -9.860     | 0.71        | 0.03            | 0.17 | 0.09 |
| LUMO+1         | -8.280     | 0.08        | 0.01            | 0.91 | 0.01 |
| LUMO+2         | -8.081     | 0.07        | 0.00            | 0.91 | 0.01 |
| LUMO+3         | -7.339     | 0.03        | 0.01            | 0.96 | 0.00 |
| LUMO+4         | -7.014     | 0.03        | 0.01            | 0.96 | 0.00 |
| LUMO+5         | -6.970     | 0.04        | 0.00            | 0.96 | 0.00 |

| $\alpha$ -spin                                                                      |                                                                                     |                                                                                      |                                                                                       |
|-------------------------------------------------------------------------------------|-------------------------------------------------------------------------------------|--------------------------------------------------------------------------------------|---------------------------------------------------------------------------------------|
| 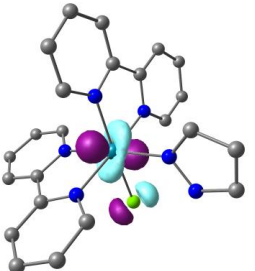   |    |    |    |
| SOMO                                                                                | HOMO-1                                                                              | HOMO-2                                                                               | HOMO-3                                                                                |
|    |    |    |    |
| LUMO                                                                                | LUMO+1                                                                              | LUMO+2                                                                               | LUMO+3                                                                                |
| $\beta$ -spin                                                                       |                                                                                     |                                                                                      |                                                                                       |
|  |  |  |  |
| HOMO                                                                                | HOMO-1                                                                              | HOMO-2                                                                               | HOMO-3                                                                                |
|  |  |  |  |
| LUMO                                                                                | LUMO+1                                                                              | LUMO+2                                                                               | LUMO+3                                                                                |

**Table S6** Composition and energies of selected molecular orbitals of  $\mathbf{1}^{3+}$  ( $S=1$ )

| MO             | Energy(eV) | Composition |                 |      |      |
|----------------|------------|-------------|-----------------|------|------|
|                |            | Os          | HL <sub>1</sub> | bpy  | Cl   |
| $\alpha$ -spin |            |             |                 |      |      |
| HOMO-5         | -17.015    | 0.39        | 0.02            | 0.27 | 0.32 |
| HOMO-4         | -16.858    | 0.23        | 0.63            | 0.11 | 0.04 |
| HOMO-3         | -16.676    | 0.46        | 0.06            | 0.25 | 0.22 |
| HOMO-2         | -16.343    | 0.20        | 0.72            | 0.06 | 0.02 |
| SOMO 2         | -16.129    | 0.01        | 0.01            | 0.97 | 0.01 |
| SOMO 1         | -16.050    | 0.01        | 0.00            | 0.99 | 0.00 |
| LUMO           | -11.537    | 0.05        | 0.01            | 0.94 | 0.00 |
| LUMO+1         | -11.448    | 0.04        | 0.00            | 0.94 | 0.01 |
| LUMO+2         | -10.910    | 0.46        | 0.03            | 0.32 | 0.19 |
| LUMO+3         | -10.479    | 0.03        | 0.02            | 0.95 | 0.00 |
| LUMO+4         | -10.402    | 0.34        | 0.10            | 0.56 | 0.00 |
| LUMO+5         | -10.249    | 0.06        | 0.02            | 0.92 | 0.00 |
| $\beta$ -spin  |            |             |                 |      |      |
| HOMO-5         | -17.225    | 0.02        | 0.01            | 0.55 | 0.42 |
| HOMO-4         | -17.091    | 0.05        | 0.63            | 0.31 | 0.01 |
| HOMO-3         | -16.576    | 0.24        | 0.61            | 0.14 | 0.01 |
| HOMO-2         | -16.143    | 0.04        | 0.01            | 0.94 | 0.01 |
| HOMO-1         | -16.051    | 0.09        | 0.05            | 0.83 | 0.03 |
| HOMO           | -16.007    | 0.37        | 0.26            | 0.26 | 0.12 |
| LUMO           | -14.358    | 0.67        | 0.07            | 0.14 | 0.12 |
| LUMO+1         | -14.101    | 0.68        | 0.06            | 0.13 | 0.13 |
| LUMO+2         | -11.487    | 0.06        | 0.01            | 0.93 | 0.00 |
| LUMO+3         | -11.347    | 0.32        | 0.00            | 0.92 | 0.01 |
| LUMO+4         | -10.470    | 0.28        | 0.01            | 0.55 | 0.12 |
| LUMO+5         | -10.431    | 0.05        | 0.03            | 0.58 | 0.11 |



| $\alpha$ -spin                                                                      |                                                                                     |                                                                                      |                                                                                       |
|-------------------------------------------------------------------------------------|-------------------------------------------------------------------------------------|--------------------------------------------------------------------------------------|---------------------------------------------------------------------------------------|
| 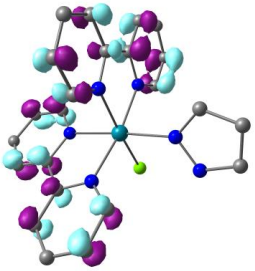   |    |    |    |
| SOMO 1                                                                              | SOMO 2                                                                              | HOMO-2                                                                               | HOMO-3                                                                                |
|    |    |    |    |
| LUMO                                                                                | LUMO+1                                                                              | LUMO+2                                                                               | LUMO+3                                                                                |
| $\beta$ -spin                                                                       |                                                                                     |                                                                                      |                                                                                       |
|  |  |  |  |
| HOMO                                                                                | HOMO-1                                                                              | HOMO-2                                                                               | HOMO-3                                                                                |
|  |  |  |  |
| LUMO                                                                                | LUMO+1                                                                              | LUMO+2                                                                               | LUMO+3                                                                                |

**Table S7** Composition and energies of selected molecular orbitals of **1** ( $S=1/2$ )

| MO             | Energy(eV) | Composition |                 |      |      |
|----------------|------------|-------------|-----------------|------|------|
|                |            | Os          | HL <sub>1</sub> | bpy  | Cl   |
| $\alpha$ -spin |            |             |                 |      |      |
| HOMO-5         | -6.418     | 0.00        | 0.01            | 0.91 | 0.08 |
| HOMO-4         | -6.291     | 0.00        | 0.00            | 0.99 | 0.00 |
| HOMO-3         | -4.606     | 0.69        | 0.08            | 0.21 | 0.02 |
| HOMO-2         | -4.485     | 0.67        | 0.01            | 0.21 | 0.11 |
| HOMO-1         | -4.262     | 0.72        | 0.03            | 0.16 | 0.09 |
| SOMO 1         | -2.342     | 0.08        | 0.01            | 0.91 | 0.01 |
| LUMO           | -1.625     | 0.13        | 0.01            | 0.85 | 0.01 |
| LUMO+1         | -0.669     | 0.04        | 0.01            | 0.94 | 0.00 |
| LUMO+2         | -0.526     | 0.03        | 0.01            | 0.96 | 0.00 |
| LUMO+3         | -0.346     | 0.04        | 0.02            | 0.95 | 0.00 |
| LUMO+4         | -0.293     | 0.09        | 0.01            | 0.90 | 0.00 |
| LUMO+5         | 0.155      | 0.06        | 0.89            | 0.04 | 0.00 |
| $\beta$ -spin  |            |             |                 |      |      |
| HOMO-5         | -6.632     | 0.06        | 0.02            | 0.16 | 0.75 |
| HOMO-4         | -6.293     | 0.00        | 0.00            | 0.93 | 0.06 |
| HOMO-3         | -6.079     | 0.01        | 0.00            | 0.98 | 0.00 |
| HOMO-2         | -4.577     | 0.69        | 0.05            | 0.20 | 0.07 |
| HOMO-1         | -4.393     | 0.70        | 0.05            | 0.19 | 0.05 |
| HOMO           | -4.237     | 0.72        | 0.02            | 0.16 | 0.10 |
| LUMO           | -1.314     | 0.09        | 0.00            | 0.90 | 0.01 |
| LUMO+1         | -1.072     | 0.09        | 0.02            | 0.89 | 0.00 |
| LUMO+2         | -0.618     | 0.05        | 0.01            | 0.93 | 0.01 |
| LUMO+3         | -0.440     | 0.03        | 0.01            | 0.96 | 0.00 |
| LUMO+4         | -0.256     | 0.06        | 0.02            | 0.92 | 0.00 |
| LUMO+5         | -0.158     | 0.05        | 0.01            | 0.94 | 0.00 |

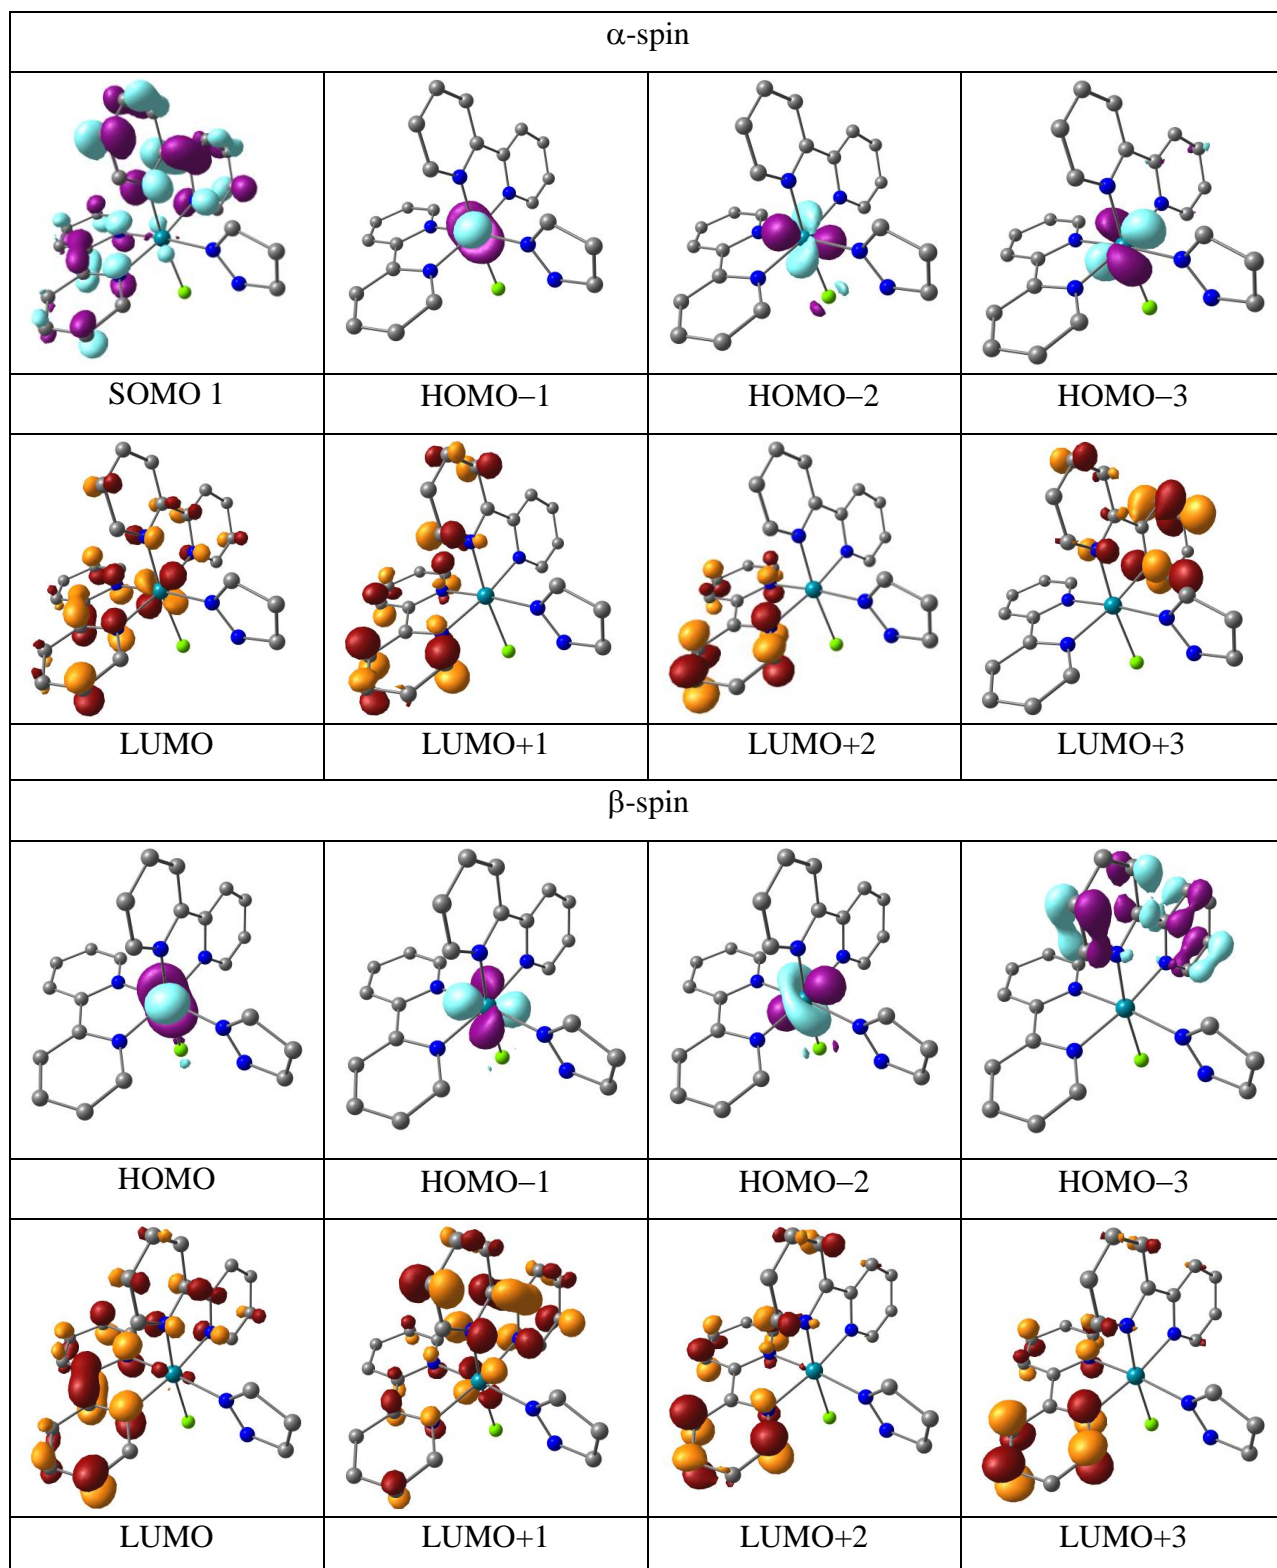

**Table S8** Composition and energies of selected molecular orbitals of  $2^+$  ( $S=0$ )

| MO     | Energy(eV) | Composition |                 |      |      |
|--------|------------|-------------|-----------------|------|------|
|        |            | Os          | HL <sub>2</sub> | bpy  | Cl   |
| HOMO-5 | -9.607     | 0.06        | 0.39            | 0.46 | 0.09 |
| HOMO-4 | -9.547     | 0.01        | 0.06            | 0.75 | 0.18 |
| HOMO-3 | -9.357     | 0.01        | 0.69            | 0.23 | 0.07 |
| HOMO-2 | -7.870     | 0.62        | 0.07            | 0.21 | 0.10 |
| HOMO-1 | -7.737     | 0.66        | 0.07            | 0.18 | 0.08 |
| HOMO   | -7.593     | 0.69        | 0.04            | 0.15 | 0.11 |
| LUMO   | -4.885     | 0.10        | 0.02            | 0.88 | 0.01 |
| LUMO+1 | -4.673     | 0.09        | 0.00            | 0.89 | 0.01 |
| LUMO+2 | -4.035     | 0.03        | 0.02            | 0.94 | 0.00 |
| LUMO+3 | -3.714     | 0.04        | 0.02            | 0.94 | 0.00 |
| LUMO+4 | -3.686     | 0.05        | 0.00            | 0.94 | 0.00 |
| LUMO+5 | -3.593     | 0.05        | 0.01            | 0.94 | 0.00 |

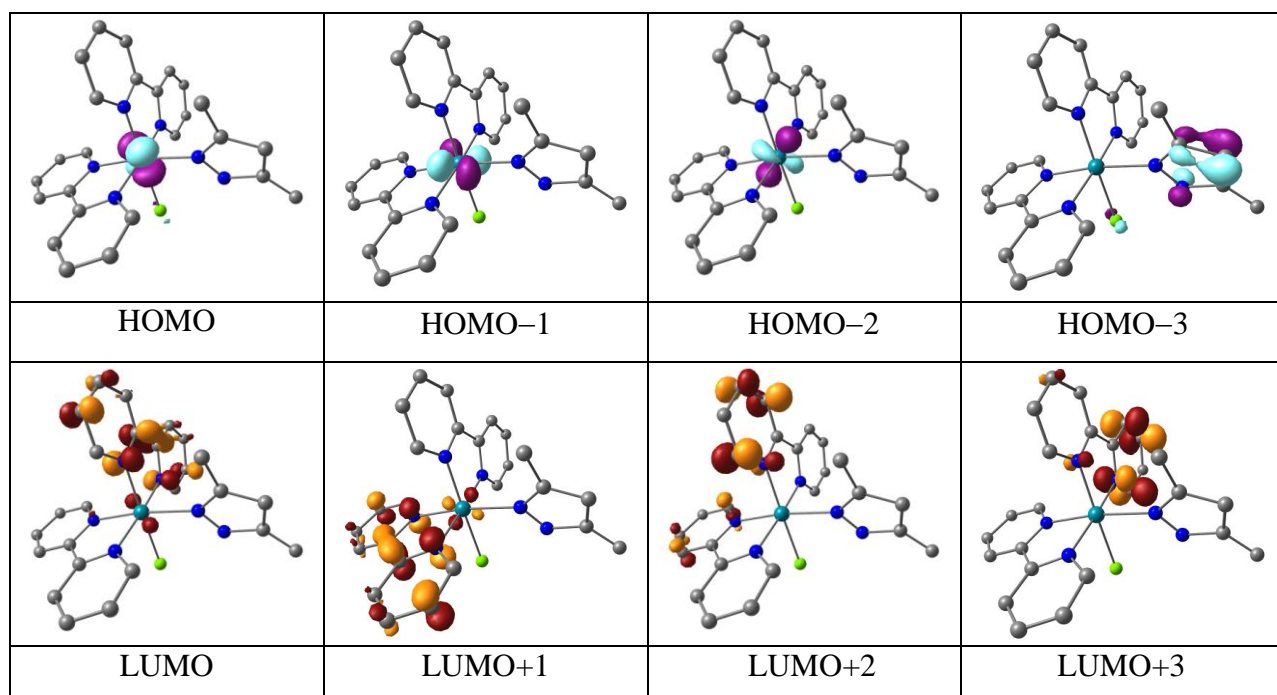

**Table S9** Composition and energies of selected molecular orbitals of  $2^{2+}$  ( $S=1/2$ )

| MO             | Energy(eV) | Composition |                 |      |      |
|----------------|------------|-------------|-----------------|------|------|
|                |            | Os          | HL <sub>2</sub> | bpy  | Cl   |
| $\alpha$ -spin |            |             |                 |      |      |
| HOMO-5         | -12.939    | 0.12        | 0.12            | 0.73 | 0.03 |
| HOMO-4         | -12.799    | 0.06        | 0.02            | 0.84 | 0.08 |
| HOMO-3         | -12.595    | 0.38        | 0.23            | 0.22 | 0.17 |
| HOMO-2         | -12.400    | 0.20        | 0.55            | 0.08 | 0.17 |
| HOMO-1         | -12.193    | 0.57        | 0.05            | 0.15 | 0.23 |
| SOMO           | -11.843    | 0.41        | 0.49            | 0.10 | 0.01 |
| LUMO           | -8.264     | 0.07        | 0.01            | 0.92 | 0.00 |
| LUMO+1         | -8.047     | 0.06        | 0.00            | 0.93 | 0.01 |
| LUMO+2         | -7.323     | 0.02        | 0.02            | 0.96 | 0.00 |
| LUMO+3         | -6.996     | 0.03        | 0.01            | 0.96 | 0.00 |
| LUMO+4         | -6.933     | 0.03        | 0.01            | 0.95 | 0.00 |
| LUMO+5         | -6.880     | 0.02        | 0.01            | 0.97 | 0.00 |
| $\beta$ -spin  |            |             |                 |      |      |
| HOMO-5         | -13.010    | 0.12        | 0.29            | 0.58 | 0.00 |
| HOMO-4         | -12.883    | 0.16        | 0.34            | 0.47 | 0.02 |
| HOMO-3         | -12.769    | 0.00        | 0.00            | 0.99 | 0.01 |
| HOMO-2         | -12.406    | 0.08        | 0.85            | 0.04 | 0.04 |
| HOMO-1         | -11.930    | 0.63        | 0.02            | 0.16 | 0.20 |
| HOMO           | -11.674    | 0.50        | 0.38            | 0.12 | 0.01 |
| LUMO           | -9.761     | 0.70        | 0.02            | 0.19 | 0.10 |
| LUMO+1         | -8.189     | 0.09        | 0.01            | 0.89 | 0.01 |
| LUMO+2         | -8.024     | 0.07        | 0.00            | 0.92 | 0.01 |
| LUMO+3         | -7.277     | 0.03        | 0.02            | 0.95 | 0.00 |
| LUMO+4         | -6.965     | 0.03        | 0.01            | 0.95 | 0.00 |
| LUMO+5         | -6.913     | 0.04        | 0.01            | 0.95 | 0.00 |

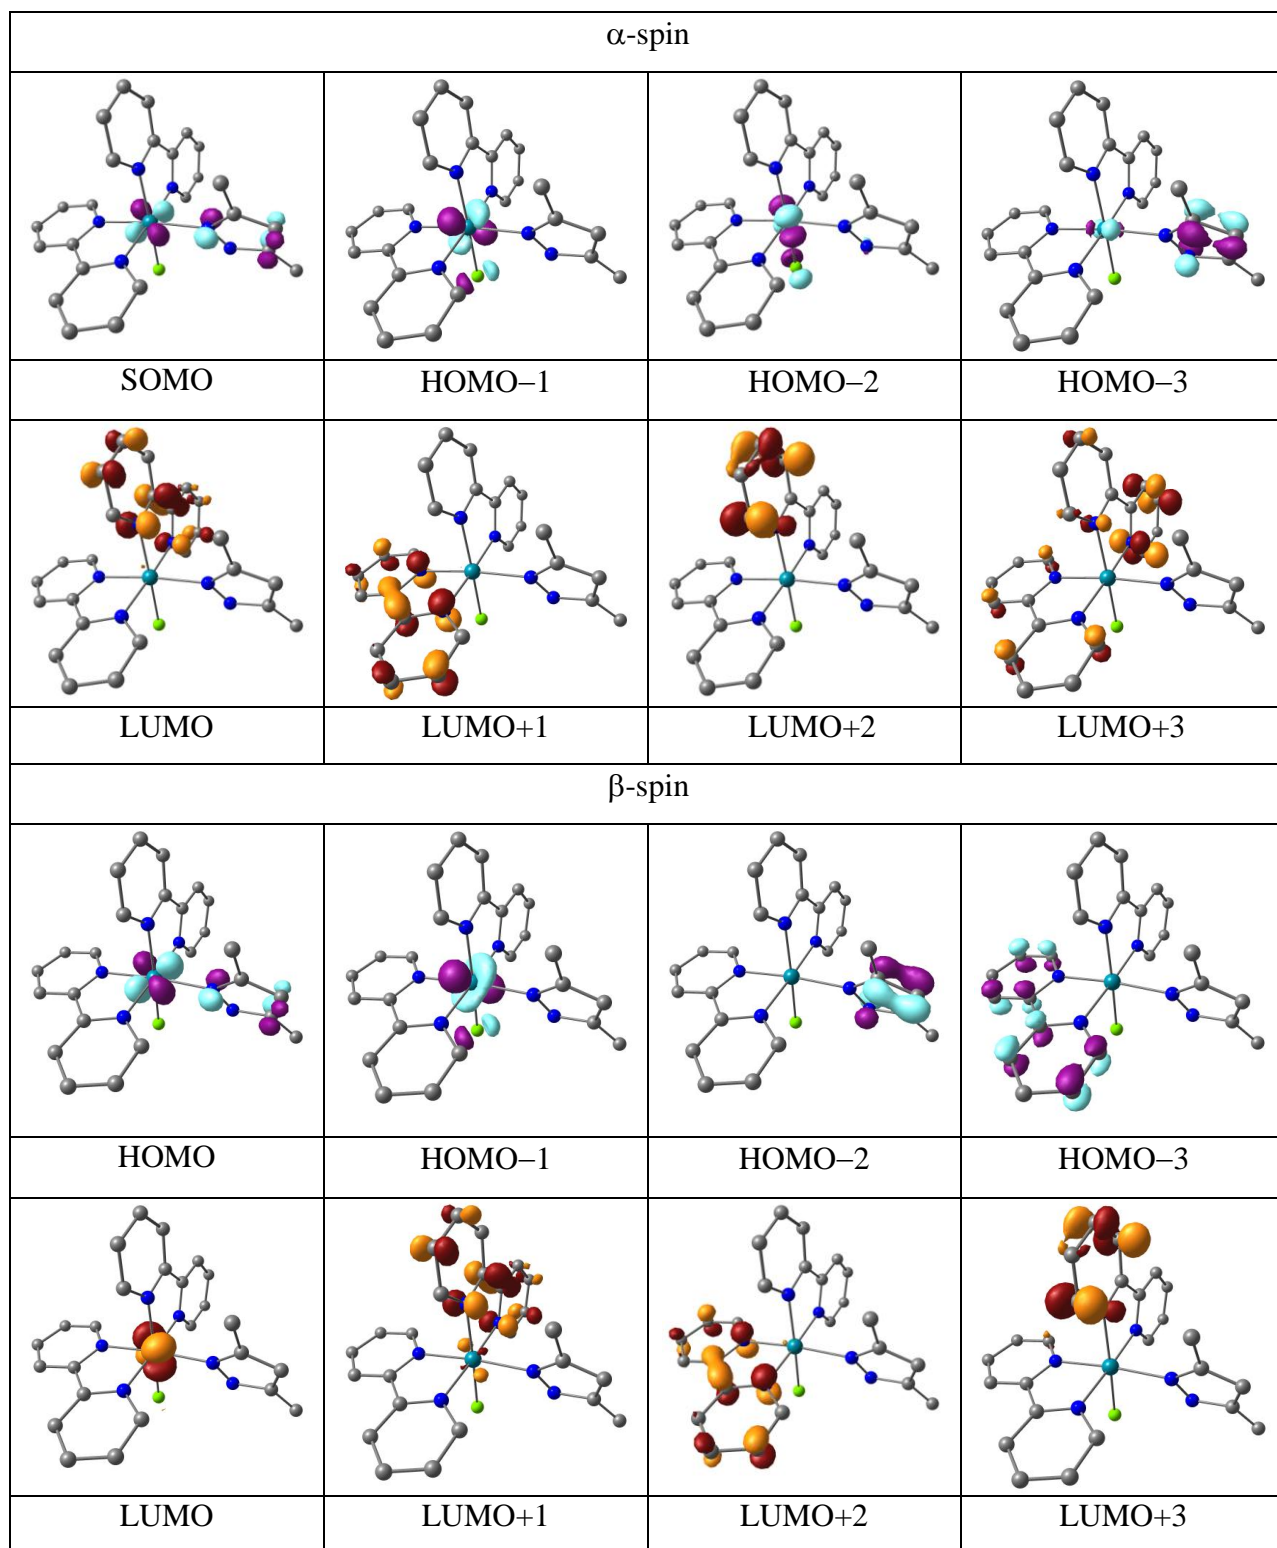

**Table S10** Composition and energies of selected molecular orbitals of  $2^{3+}$  ( $S=1$ )

| MO             | Energy(eV) | Composition |                 |      |      |
|----------------|------------|-------------|-----------------|------|------|
|                |            | Os          | HL <sub>2</sub> | bpy  | Cl   |
| $\alpha$ -spin |            |             |                 |      |      |
| HOMO-5         | -16.533    | 0.40        | 0.09            | 0.20 | 0.09 |
| HOMO-4         | -16.312    | 0.20        | 0.63            | 0.11 | 0.06 |
| HOMO-3         | -16.278    | 0.45        | 0.07            | 0.21 | 0.27 |
| HOMO-2         | -16.040    | 0.13        | 0.64            | 0.22 | 0.00 |
| SOMO 2         | -15.958    | 0.06        | 0.24            | 0.66 | 0.03 |
| SOMO 1         | -15.787    | 0.01        | 0.00            | 0.98 | 0.00 |
| LUMO           | -11.390    | 0.05        | 0.01            | 0.94 | 0.00 |
| LUMO+1         | -11.162    | 0.05        | 0.00            | 0.94 | 0.01 |
| LUMO+2         | -10.498    | 0.44        | 0.05            | 0.33 | 0.18 |
| LUMO+3         | -10.326    | 0.04        | 0.03            | 0.92 | 0.01 |
| LUMO+4         | -10.138    | 0.28        | 0.08            | 0.64 | 0.00 |
| LUMO+5         | -10.093    | 0.22        | 0.05            | 0.72 | 0.01 |
| $\beta$ -spin  |            |             |                 |      |      |
| HOMO-5         | -16.910    | 0.03        | 0.02            | 0.48 | 0.47 |
| HOMO-4         | -16.496    | 0.18        | 0.64            | 0.18 | 0.00 |
| HOMO-3         | -16.093    | 0.27        | 0.54            | 0.13 | 0.06 |
| HOMO-2         | -16.001    | 0.03        | 0.06            | 0.90 | 0.01 |
| HOMO-1         | -15.791    | 0.00        | 0.00            | 0.99 | 0.00 |
| HOMO           | -15.657    | 0.42        | 0.28            | 0.13 | 0.16 |
| LUMO           | -14.085    | 0.59        | 0.24            | 0.13 | 0.05 |
| LUMO+1         | -13.682    | 0.68        | 0.01            | 0.14 | 0.17 |
| LUMO+2         | -11.275    | 0.07        | 0.01            | 0.91 | 0.00 |
| LUMO+3         | -11.108    | 0.06        | 0.00            | 0.93 | 0.01 |
| LUMO+4         | -10.283    | 0.03        | 0.02            | 0.95 | 0.00 |
| LUMO+5         | -10.120    | 0.24        | 0.04            | 0.62 | 0.10 |

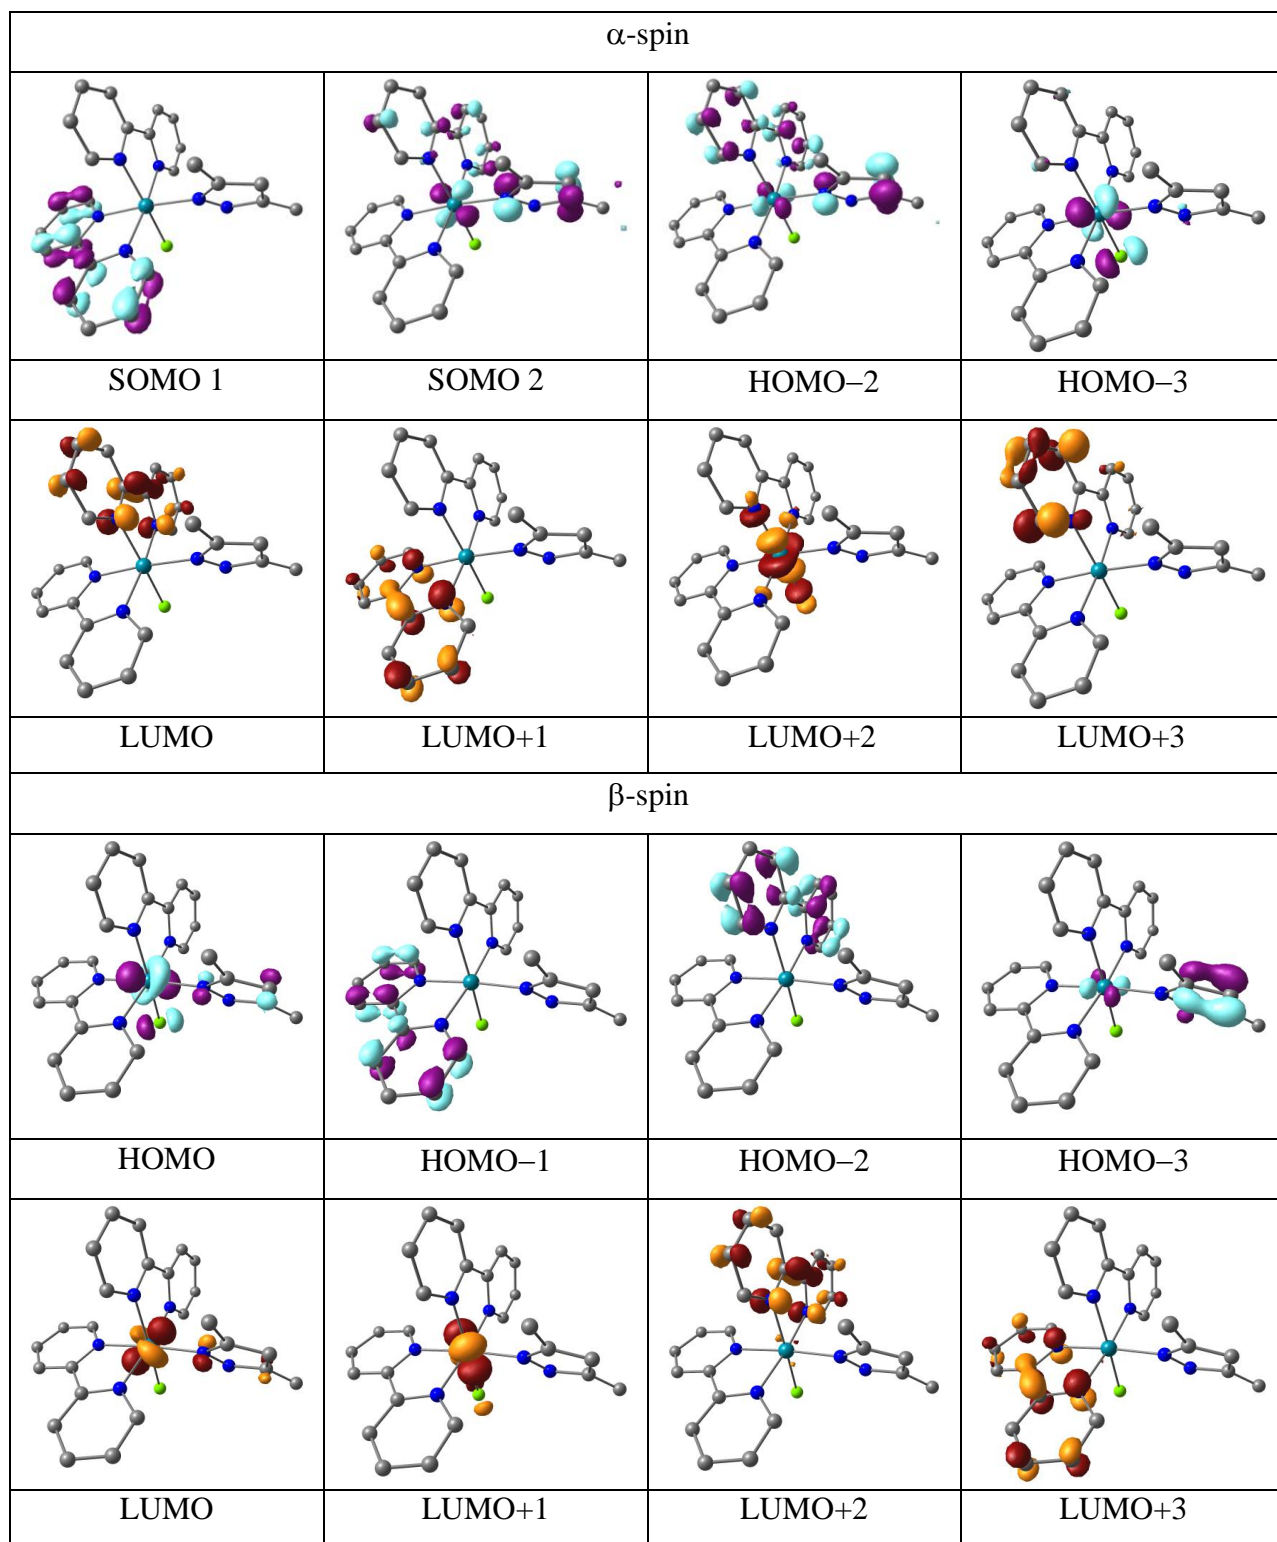



**Table S11** Composition and energies of selected molecular orbitals of **2** ( $S=1/2$ )

| MO             | Energy(eV) | Composition |                 |      |      |
|----------------|------------|-------------|-----------------|------|------|
|                |            | Os          | HL <sub>2</sub> | bpy  | Cl   |
| $\alpha$ -spin |            |             |                 |      |      |
| HOMO-5         | -6.376     | 0.00        | 0.01            | 0.87 | 0.03 |
| HOMO-4         | -6.270     | 0.00        | 0.03            | 0.97 | 0.08 |
| HOMO-3         | -4.518     | 0.71        | 0.10            | 0.18 | 0.17 |
| HOMO-2         | -4.481     | 0.65        | 0.02            | 0.23 | 0.17 |
| HOMO-1         | -4.212     | 0.72        | 0.02            | 0.16 | 0.23 |
| SOMO           | -2.308     | 0.08        | 0.01            | 0.91 | 0.01 |
| LUMO           | -1.606     | 0.13        | 0.01            | 0.85 | 0.01 |
| LUMO+1         | -0.635     | 0.04        | 0.03            | 0.92 | 0.00 |
| LUMO+2         | -0.491     | 0.03        | 0.01            | 0.96 | 0.00 |
| LUMO+3         | -0.333     | 0.04        | 0.01            | 0.95 | 0.00 |
| LUMO+4         | -0.273     | 0.09        | 0.03            | 0.88 | 0.00 |
| LUMO+5         | 0.253      | 0.04        | 0.92            | 0.04 | 0.00 |
| $\beta$ -spin  |            |             |                 |      |      |
| HOMO-5         | -6.525     | 0.04        | 0.18            | 0.15 | 0.63 |
| HOMO-4         | -6.242     | 0.00        | 0.01            | 0.92 | 0.07 |
| HOMO-3         | -6.067     | 0.01        | 0.02            | 0.97 | 0.00 |
| HOMO-2         | -4.509     | 0.67        | 0.05            | 0.20 | 0.09 |
| HOMO-1         | -4.391     | 0.73        | 0.07            | 0.18 | 0.03 |
| HOMO           | -4.169     | 0.71        | 0.01            | 0.17 | 0.10 |
| LUMO           | -1.262     | 0.08        | 0.00            | 0.90 | 0.01 |
| LUMO+1         | -1.069     | 0.09        | 0.03            | 0.88 | 0.00 |
| LUMO+2         | -0.581     | 0.05        | 0.03            | 0.92 | 0.01 |
| LUMO+3         | -0.409     | 0.04        | 0.01            | 0.95 | 0.00 |
| LUMO+4         | -0.229     | 0.05        | 0.01            | 0.94 | 0.00 |
| LUMO+5         | -0.160     | 0.06        | 0.03            | 0.91 | 0.00 |

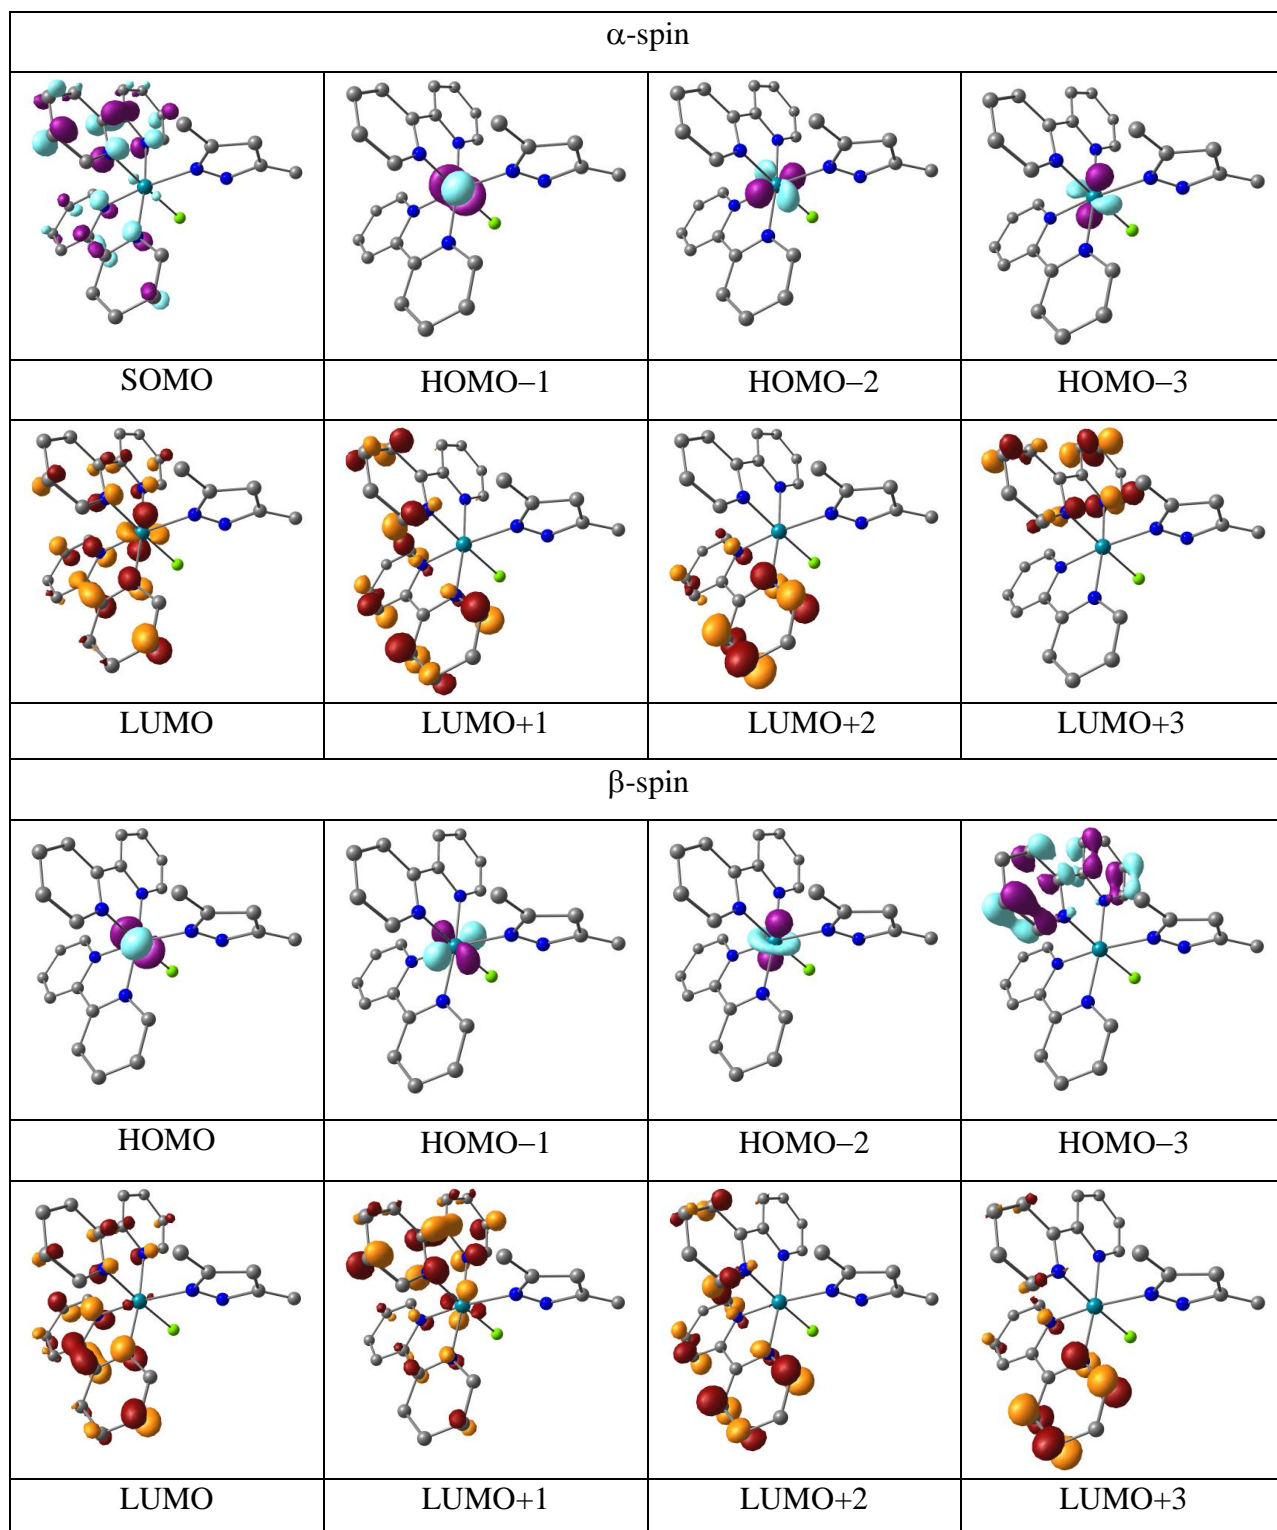

**Table S12** DFT calculated Mulliken spin densities in the paramagnetic states of **1<sup>n</sup>** and **2<sup>n</sup>**

| Complex                                 | Os1    | HL     | bpy   | Cl    |
|-----------------------------------------|--------|--------|-------|-------|
| <b>1</b> <sup>3+</sup> ( <i>S</i> =1)   | 1.497  | 0.129  | 0.096 | 0.278 |
| <b>1</b> <sup>2+</sup> ( <i>S</i> =1/2) | 0.893  | 0.014  | 0.007 | 0.087 |
| <b>1</b> ( <i>S</i> =1/2)               | -0.058 | 0.002  | 1.055 | 0.001 |
| <b>2</b> <sup>3+</sup> ( <i>S</i> =1)   | 1.427  | 0.291  | 0.076 | 0.204 |
| <b>2</b> <sup>2+</sup> ( <i>S</i> =1/2) | 0.888  | -0.013 | 0.016 | 0.106 |
| <b>2</b> ( <i>S</i> =1/2)               | -0.056 | 0.001  | 1.062 | 0.002 |

**Table S13** TD-DFT ((U)B3LYP/CPCM/CH<sub>3</sub>CN) calculated electronic transitions for **1<sup>n</sup>** and **2<sup>n</sup>**

| $\lambda$ /nm (expt.)<br>( $\epsilon$ /dm <sup>3</sup> mol <sup>-1</sup> cm <sup>-1</sup> ) | $\lambda$ /nm<br>(DFT)<br>( <i>f</i> )                   | Transition                                                | Character                                                           |
|---------------------------------------------------------------------------------------------|----------------------------------------------------------|-----------------------------------------------------------|---------------------------------------------------------------------|
| <b>1<sup>2+</sup> (S=1/2)</b>                                                               |                                                          |                                                           |                                                                     |
| 518(3180)                                                                                   | 517(0.003)                                               | HOMO-2( $\beta$ ) $\rightarrow$ LUMO( $\beta$ )(0.99)     | bpy( $\pi$ ) $\rightarrow$ Os(d $\pi$ )                             |
| 485(4760)                                                                                   | 462(0.011)                                               | HOMO-4( $\beta$ ) $\rightarrow$ LUMO( $\beta$ )(0.97)     | HL <sub>1</sub> ( $\pi$ )/bpy( $\pi$ ) $\rightarrow$ Os(d $\pi$ )   |
| 383(20340)                                                                                  | 365(0.032)                                               | HOMO-1( $\alpha$ ) $\rightarrow$ LUMO+1( $\alpha$ )(0.70) | Os(d $\pi$ )/Cl( $\pi$ ) $\rightarrow$ bpy( $\pi^*$ )               |
| 287(94310)                                                                                  | 271(0.073)                                               | HOMO-5( $\alpha$ ) $\rightarrow$ LUMO( $\alpha$ )(0.35)   | HL <sub>1</sub> ( $\pi$ )/bpy( $\pi$ ) $\rightarrow$ bpy( $\pi^*$ ) |
|                                                                                             |                                                          | HOMO-8( $\beta$ ) $\rightarrow$ LUMO+1( $\beta$ )(0.15)   | Cl( $\pi$ )/bpy( $\pi$ ) $\rightarrow$ bpy( $\pi^*$ )               |
|                                                                                             | 260(0.051)                                               | HOMO-8( $\beta$ ) $\rightarrow$ LUMO+1( $\beta$ )(0.31)   | bpy( $\pi$ )/Cl( $\pi$ ) $\rightarrow$ bpy( $\pi^*$ )               |
|                                                                                             | HOMO-10( $\alpha$ ) $\rightarrow$ LUMO( $\alpha$ )(0.21) | bpy( $\pi$ ) $\rightarrow$ bpy( $\pi^*$ )                 |                                                                     |
| <b>1<sup>+</sup> (S=0)</b>                                                                  |                                                          |                                                           |                                                                     |
| 724(7970)                                                                                   | 612(0.008)                                               | HOMO $\rightarrow$ LUMO(0.68)                             | Os(d $\pi$ )/Cl( $\pi$ ) $\rightarrow$ bpy( $\pi^*$ )               |
|                                                                                             | 598(0.002)                                               | HOMO $\rightarrow$ LUMO+1(0.68)                           | Os(d $\pi$ )/Cl( $\pi$ ) $\rightarrow$ bpy( $\pi^*$ )               |
| 520(29330)                                                                                  | 491(0.193)                                               | HOMO-2 $\rightarrow$ LUMO(0.59)                           | Os(d $\pi$ )/bpy( $\pi$ ) $\rightarrow$ bpy( $\pi^*$ )              |
| 427(25760)                                                                                  | 463(0.025)                                               | HOMO-2 $\rightarrow$ LUMO+1(0.58)                         | Os(d $\pi$ )/bpy( $\pi$ ) $\rightarrow$ bpy( $\pi^*$ )              |
|                                                                                             |                                                          | 368(0.031)                                                | HOMO-2 $\rightarrow$ LUMO+2(0.55)                                   |
|                                                                                             | 355(29820)                                               | 322(0.097)                                                | HOMO-2 $\rightarrow$ LUMO+5(0.44)                                   |
| 294(186320)                                                                                 | 361(0.134)                                               | HOMO-2 $\rightarrow$ LUMO+3(0.26)                         | Os(d $\pi$ )/bpy( $\pi$ ) $\rightarrow$ bpy( $\pi^*$ )              |
|                                                                                             |                                                          | HOMO-1 $\rightarrow$ LUMO+3(0.46)                         | Os(d $\pi$ )/Cl( $\pi$ ) $\rightarrow$ bpy( $\pi^*$ )               |
|                                                                                             | 278(0.695)                                               | HOMO-2 $\rightarrow$ LUMO+2(0.15)                         | Os(d $\pi$ )/bpy( $\pi$ ) $\rightarrow$ bpy( $\pi^*$ )              |
|                                                                                             |                                                          | HOMO-3 $\rightarrow$ LUMO+1(0.51)                         | bpy( $\pi$ )/Cl( $\pi$ ) $\rightarrow$ bpy( $\pi^*$ )               |
| <b>2<sup>2+</sup> (S=1/2)</b>                                                               |                                                          |                                                           |                                                                     |
| 522(2060)                                                                                   | 517(0.003)                                               | HOMO-3( $\beta$ ) $\rightarrow$ LUMO( $\beta$ )(0.99)     | bpy( $\pi$ ) $\rightarrow$ Os(d $\pi$ )                             |
| 490(3890)                                                                                   | 491(0.011)                                               | HOMO-5( $\beta$ ) $\rightarrow$ LUMO( $\beta$ )(0.87)     | bpy( $\pi$ )/HL <sub>2</sub> ( $\pi$ ) $\rightarrow$ Os(d $\pi$ )   |
| 387(14760)                                                                                  | 390(0.031)                                               | SOMO( $\alpha$ ) $\rightarrow$ LUMO( $\alpha$ )(0.59)     | HL <sub>2</sub> ( $\pi$ )/Os(d $\pi$ ) $\rightarrow$ bpy( $\pi^*$ ) |
|                                                                                             | 426(0.013)                                               | HOMO( $\beta$ ) $\rightarrow$ LUMO+2( $\beta$ )(0.58)     | Os(d $\pi$ )/HL <sub>2</sub> ( $\pi$ ) $\rightarrow$ bpy( $\pi^*$ ) |
| 286(71130)                                                                                  | 276(0.122)                                               | HOMO-8( $\alpha$ ) $\rightarrow$ LUMO+1( $\alpha$ )(0.33) | bpy( $\pi$ ) $\rightarrow$ bpy( $\pi^*$ )                           |
|                                                                                             |                                                          | HOMO-4( $\alpha$ ) $\rightarrow$ LUMO+1( $\alpha$ )(0.20) | Cl( $\pi$ )/bpy( $\pi$ ) $\rightarrow$ bpy( $\pi^*$ )               |
| <b>2<sup>+</sup> (S=0)</b>                                                                  |                                                          |                                                           |                                                                     |
| 734(7210)                                                                                   | 610(0.007)                                               | HOMO $\rightarrow$ LUMO(0.68)                             | Os(d $\pi$ )/bpy( $\pi$ ) $\rightarrow$ bpy( $\pi^*$ )              |
|                                                                                             | 604(0.003)                                               | HOMO $\rightarrow$ LUMO+1(0.68)                           | Os(d $\pi$ )/bpy( $\pi$ ) $\rightarrow$ bpy( $\pi^*$ )              |
| 524(24550)                                                                                  | 499(0.168)                                               | HOMO-2 $\rightarrow$ LUMO(0.51)                           | Os(d $\pi$ )/bpy( $\pi$ ) $\rightarrow$ bpy( $\pi^*$ )              |
|                                                                                             | 540(0.004)                                               | HOMO-1 $\rightarrow$ LUMO(0.47)                           | Os(d $\pi$ )/bpy( $\pi$ ) $\rightarrow$ bpy( $\pi^*$ )              |
|                                                                                             |                                                          | HOMO-2 $\rightarrow$ LUMO+1(0.36)                         | Os(d $\pi$ )/bpy( $\pi$ ) $\rightarrow$ bpy( $\pi^*$ )              |
| 430(21690)                                                                                  | 410(0.001)                                               | HOMO-1 $\rightarrow$ LUMO+2(0.67)                         | Os(d $\pi$ )/bpy( $\pi$ ) $\rightarrow$ bpy( $\pi^*$ )              |
| 355(23760)                                                                                  | 360(0.008)                                               | HOMO-1 $\rightarrow$ LUMO+5(0.62)                         | Os(d $\pi$ )/bpy( $\pi$ ) $\rightarrow$ bpy( $\pi^*$ )              |
| 296(147200)                                                                                 | 279(0.309)                                               | HOMO-5 $\rightarrow$ LUMO+1(0.52)                         | bpy( $\pi$ )/HL <sub>2</sub> ( $\pi$ ) $\rightarrow$ bpy( $\pi^*$ ) |
|                                                                                             | 287(0.053)                                               | HOMO-4 $\rightarrow$ LUMO(0.42)                           | bpy( $\pi$ )/Cl( $\pi$ ) $\rightarrow$ bpy( $\pi^*$ )               |
|                                                                                             |                                                          | HOMO-4 $\rightarrow$ LUMO+1(0.22)                         | bpy( $\pi$ )/Cl( $\pi$ ) $\rightarrow$ bpy( $\pi^*$ )               |

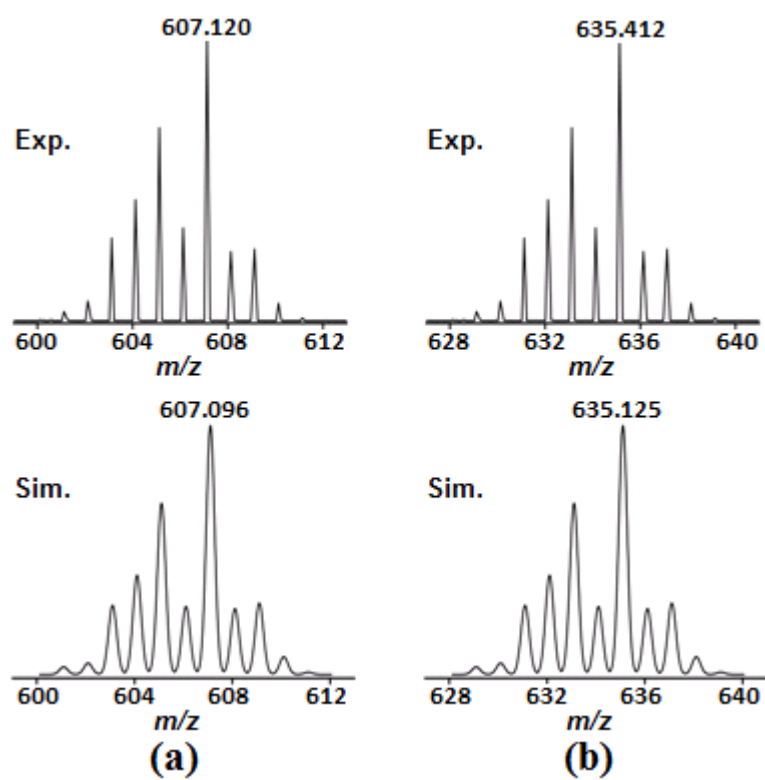

**Fig. S1** ESI-MS of (a)  $[1]\text{ClO}_4$  and (b)  $[2]\text{ClO}_4$  in  $\text{CH}_3\text{CN}$ .

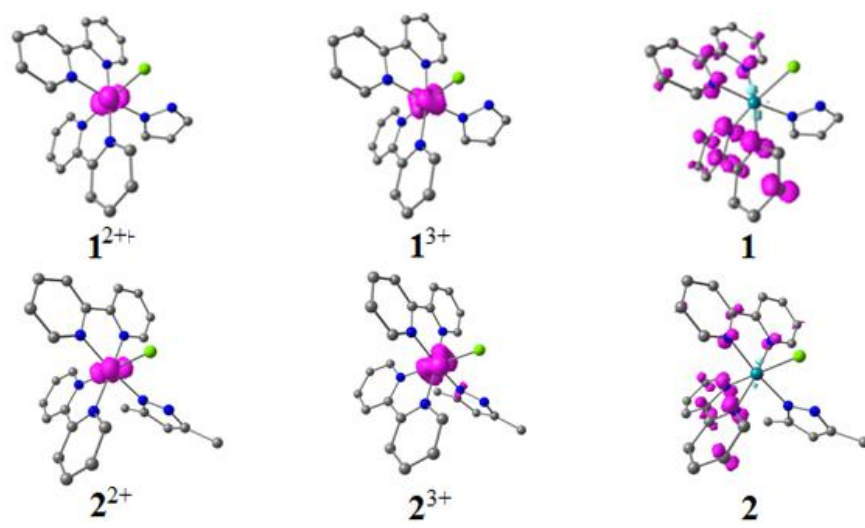

**Fig. S2** DFT calculated Mulliken spin density plots for paramagnetic forms of  $1^n$  and  $2^n$ .

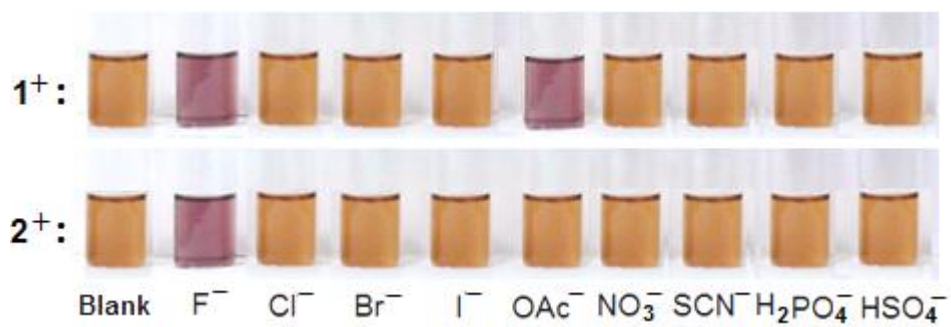

**Fig. S3** The visual change in colour of  $1^+$  and  $2^+$  ( $5 \times 10^{-5} \text{ mol dm}^{-3}$ ) in  $\text{CH}_3\text{CN}$  on addition of eight equivalents of the TBA salt of anions.

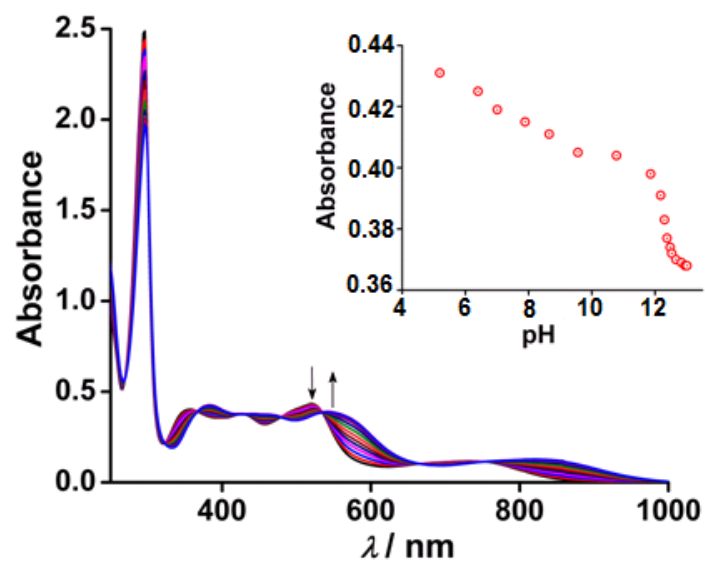

**Fig. S4** Electronic spectra of  $1^+$  as a function of pH in 1:1  $\text{CH}_3\text{CN}-\text{H}_2\text{O}$ . Inset shows the change in absorbance at 520 nm with the pH.



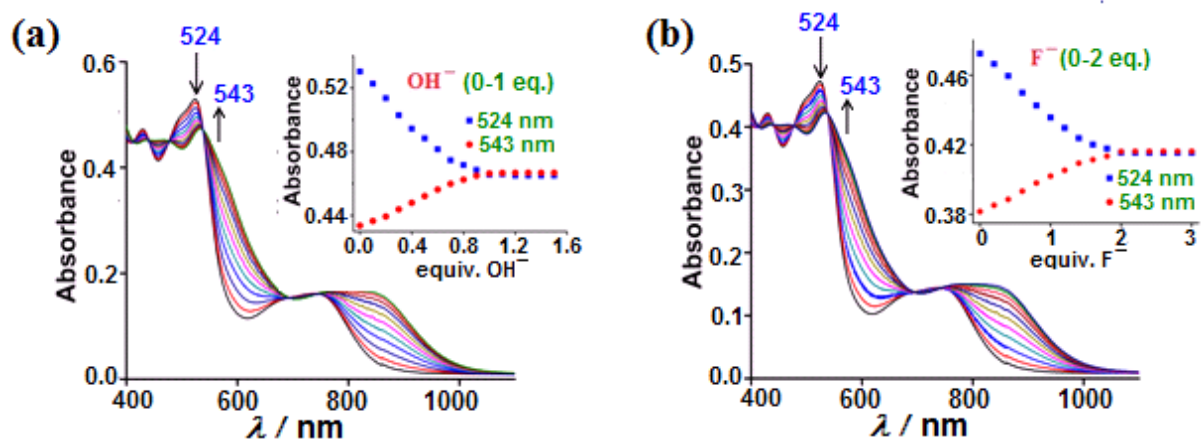

**Fig. S5** UV-vis spectral changes of  $2^+$  ( $5 \times 10^{-5} \text{ mol dm}^{-3}$ ) in  $\text{CH}_3\text{CN}$  on gradual additions of (a)  $\text{OH}^-$  and (b)  $\text{F}^-$ . The insets show the changes in absorbance at 524 nm and 543 nm for  $\text{OH}^-$  and  $\text{F}^-$  as a function of the equivalents of respective anions.

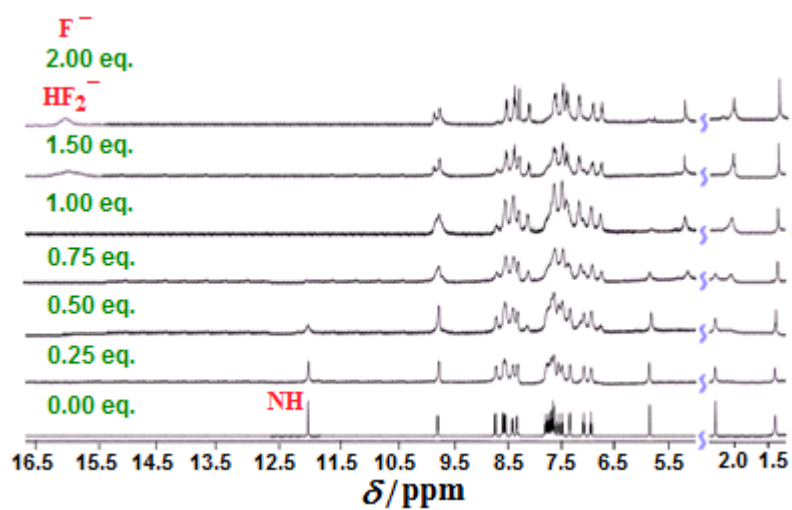

**Fig. S6** <sup>1</sup>H-NMR titration of 2<sup>+</sup> in (CD<sub>3</sub>)<sub>2</sub>SO in presence of TBA salt of F<sup>-</sup> ion (0-2 equivalents).

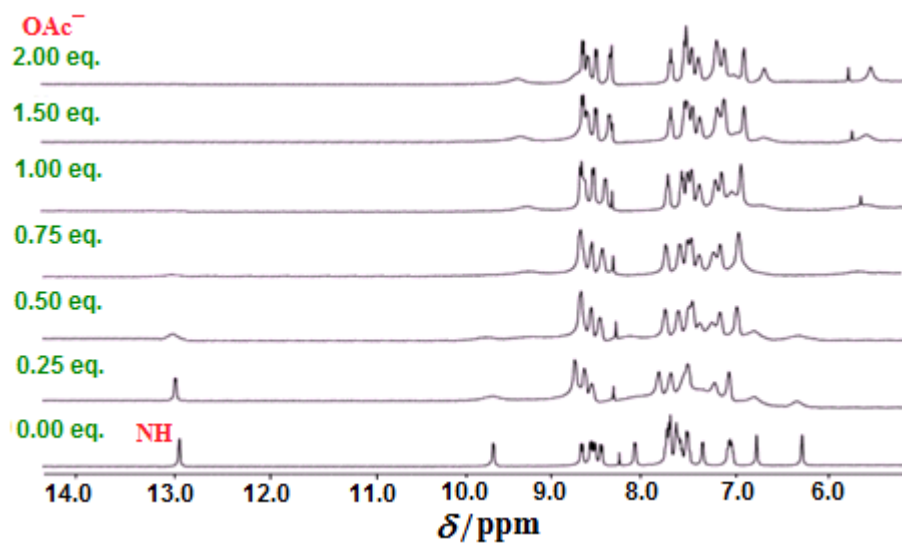

**Fig. S7**  $^1\text{H-NMR}$  titration of  $1^+$  in  $(\text{CD}_3)_2\text{SO}$  in presence of TBA salt of  $\text{OAc}^-$  ion (0-2 equivalents).

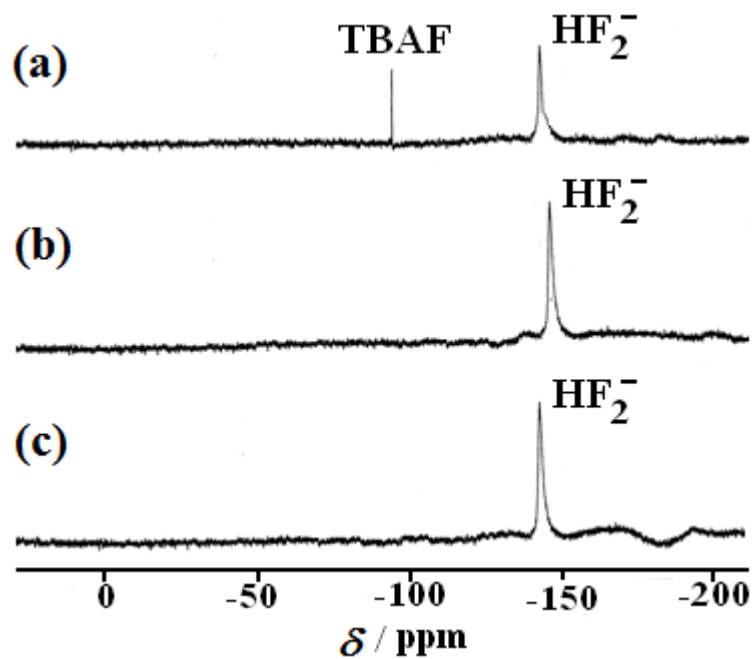

**Fig. S8**  $^{19}\text{F}$ -NMR spectra in  $(\text{CD}_3)_2\text{SO}$  of (a) TBAF (b) TBAF in presence of one equivalent of  $\mathbf{1}^+$  and (c) TBAF in presence of one equivalent of  $\mathbf{2}^+$ . Trifluoro-toluene is used as an internal standard ( $\delta = -62.23$ ) at 298 K.

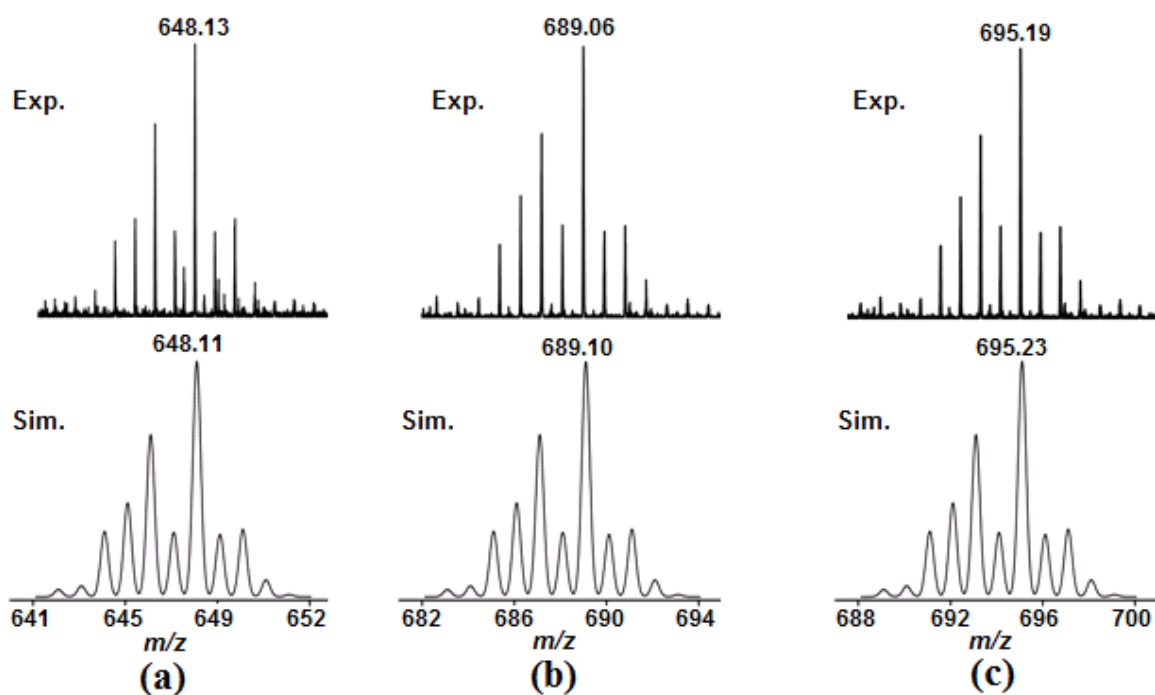

**Fig. S9** ESI-MS in  $\text{CH}_3\text{CN}$  of *in situ* generated (a)  $[\mathbf{1}^+.\text{F}^-+\text{Na}^+]$ , (b)  $[\mathbf{1}^+.\text{OAc}^-+\text{Na}^+]$  and (c)  $[\mathbf{2}^+.\text{F}^-+\text{CH}_3\text{CN}+\text{H}^+]$  by the addition of  $\text{F}^-$  and  $\text{OAc}^-$ , respectively, in the solution of  $\mathbf{1}^+$  and  $\mathbf{2}^+$ .

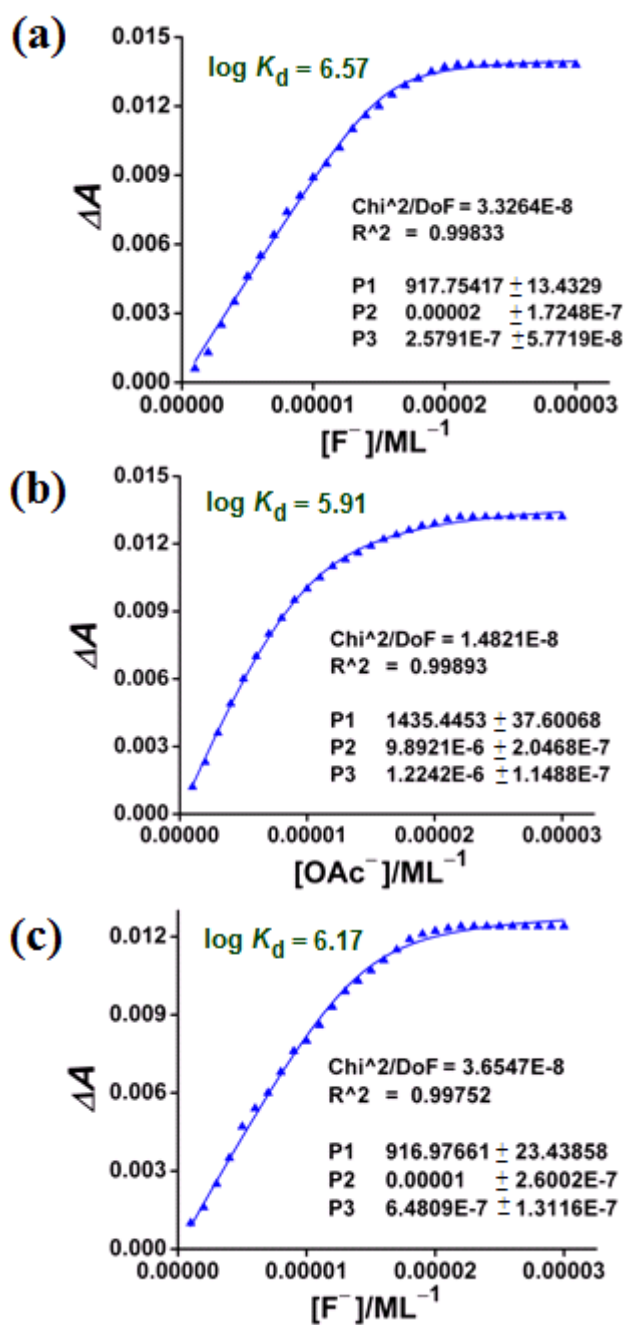

**Fig. S10** Plots of the changes in absorbance ( $\Delta A$ ) in  $CH_3CN$  with respect to the initial absorbance of  $1^+$  ( $10^{-5} \text{ mol dm}^{-3}$ ) at 520 nm and  $2^+$  ( $10^{-5} \text{ mol dm}^{-3}$ ) at 524 nm on each addition of (a)  $F^-$ , (b)  $OAc^-$  and (c)  $F^-$  versus the concentration of the respective anions.

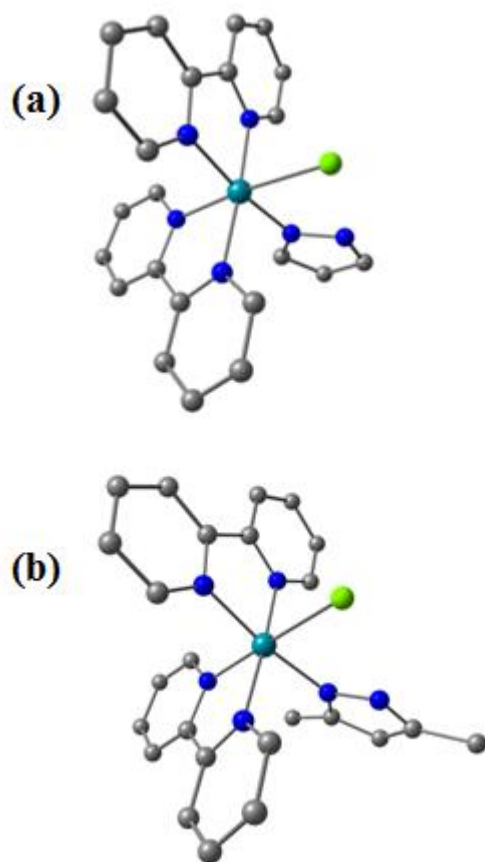

**Fig. S11** DFT optimised structures of  $1^+$  and  $2^+$ .

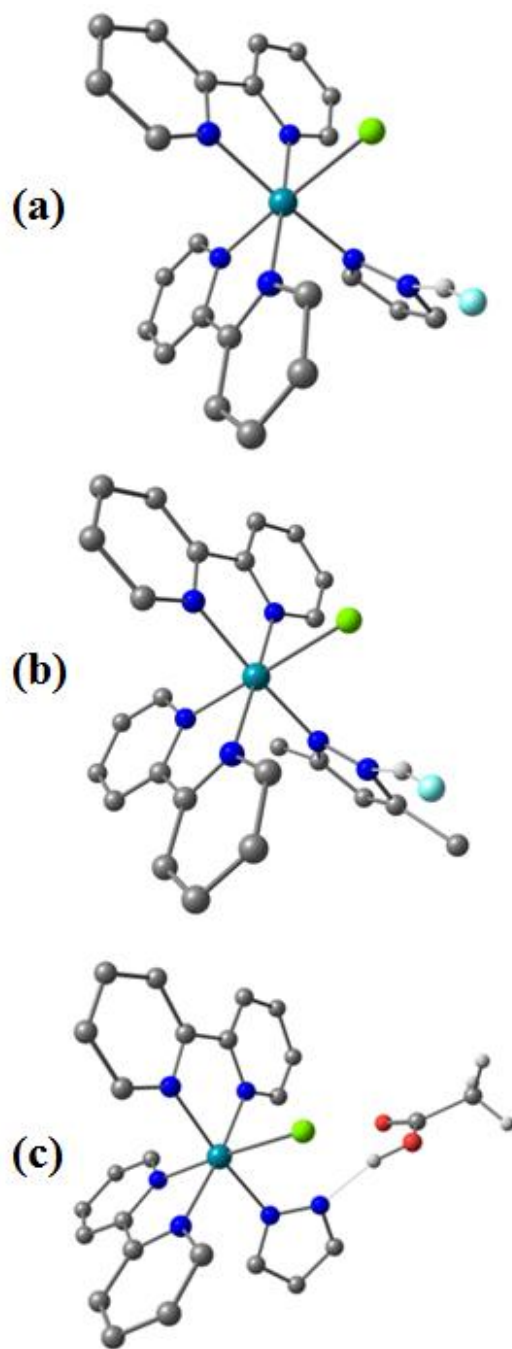

**Fig. S12** DFT optimised structures of (a)  $[1^+ \cdots F^-]$  (**A**), (b)  $[2^+ \cdots F^-]$  (**A'**) and (c)  $[1^+ \cdots OAc^-]$

**(B).**
